# Supplementary material for: Dichloro(2,2′-bipyridine)copper/MAO: An Active and Stereospecific Catalyst for 1,3-Diene Polymerization
Source: MDPI journal article supplement (doi:10.3390/molecules28010374), 2023-01-02

---

## SUPPORTING INFORMATION

# Dichloro(2,2'-bipyridine)copper/MAO. An Active and Stereospecific Catalyst for 1,3-Diene Polymerization

Giovanni Ricci,<sup>a,\*</sup> Giuseppe Leone,<sup>a</sup> Giorgia Zanchin,<sup>a</sup> Francesco Masi,<sup>b</sup>  
Massimo Guelfi,<sup>c</sup> Guido Pampaloni<sup>c</sup>

<sup>a</sup> CNR-Istituto di Scienze e Tecnologie Chimiche "Giulio Natta" (SCITEC), via A. Corti 12, I-20133 Milano, Italy.

<sup>b</sup> Scientific Advisor, Via Galvani 7, I- 26866 Sant'Angelo Lodigiano (LO), Italy.

<sup>c</sup> Università di Pisa, Dipartimento di Chimica e Chimica Industriale, Via Moruzzi 13, I-56124 Pisa, Italy.

\* Correspondence: giovanni.ricci@scitec.cnr.it

---

### Table of Contents

**Figure S1.** IR spectrum (solid state) of Cu(bipy)Cl<sub>2</sub> prepared in toluene.

**Figure S2.** IR spectrum (solid state) of Cu(bipy)Cl<sub>2</sub> prepared in ethanol.

**Figure S3.** Superposition of IR spectra (solid state) of Cu(bipy)Cl<sub>2</sub> prepared in ethanol/toluene.

**Figure S4 – S13.** FTIR spectra of the obtained polymers.

**Figure S14 – S22.** <sup>1</sup>H and <sup>13</sup>C NMR spectra of the obtained polymers.

**Figure S1.** IR spectrum (solid state) of **Cu(bipy)Cl<sub>2</sub>** prepared in toluene.

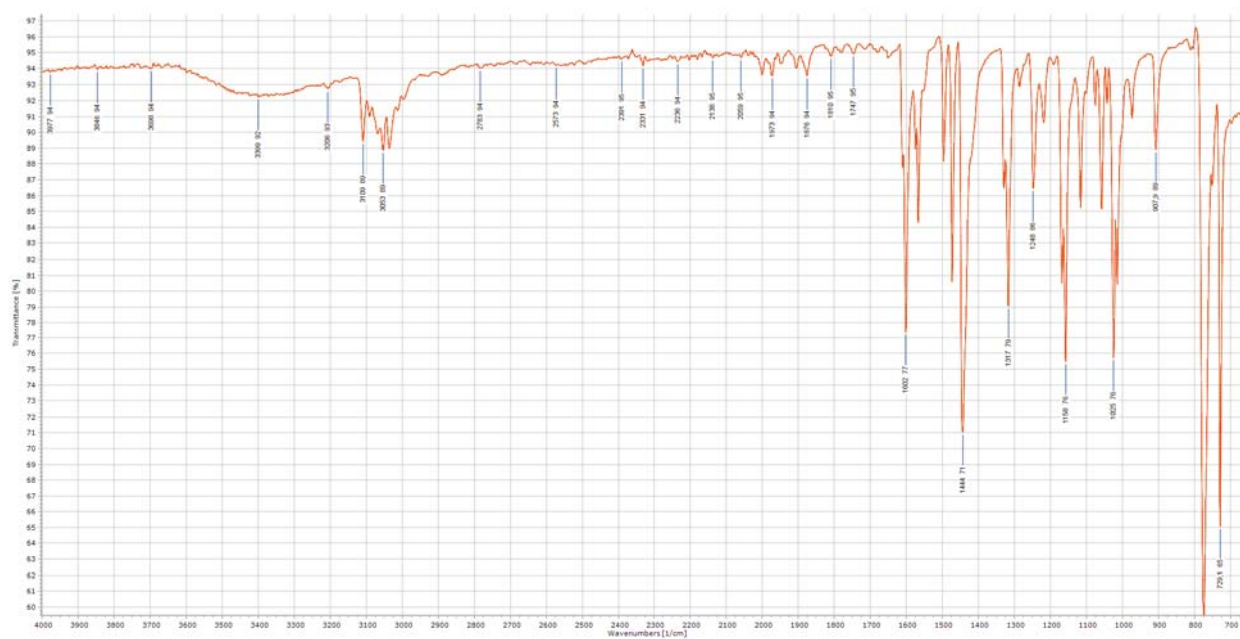

**Figure S2.** IR spectrum (solid state) of **Cu(bipy)Cl<sub>2</sub>** prepared in ethanol.

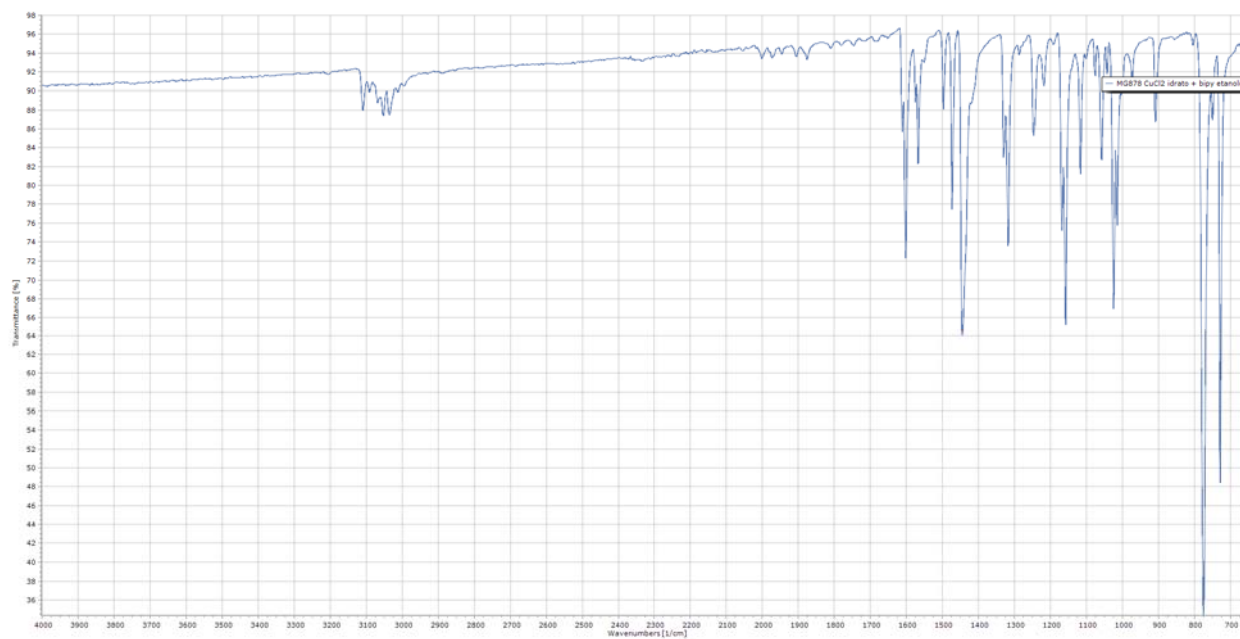

**Figure S3.** Superposition of IR spectra (solid state) of **Cu(bipy)Cl<sub>2</sub>** prepared in ethanol/toluene.

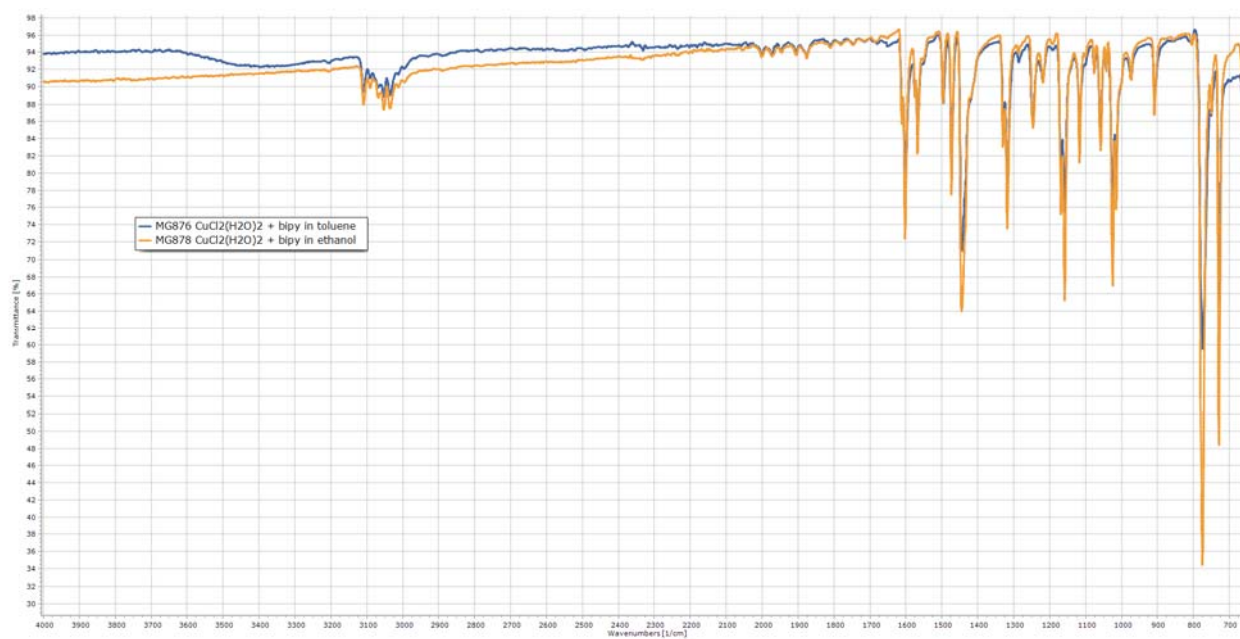

**Figure S4.** FTIR spectrum of entry **1** (ref. Table 1 of the manuscript).

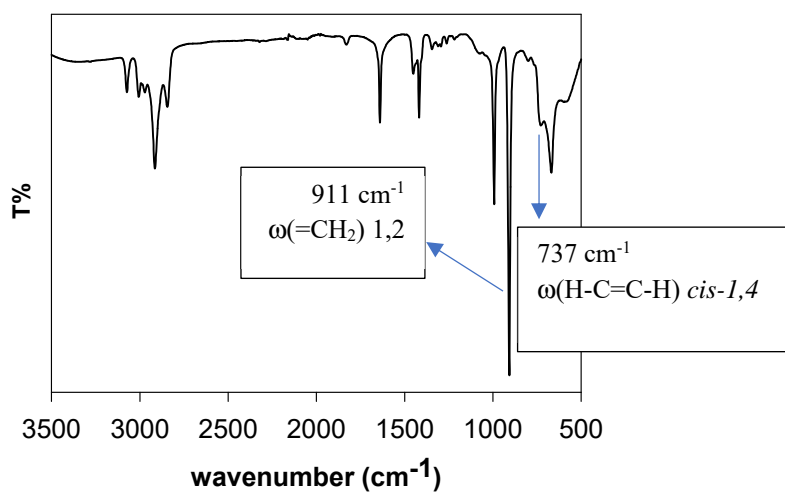

**Figure S5.** FTIR spectrum of entry **2** (ref. Table 1 of the manuscript).

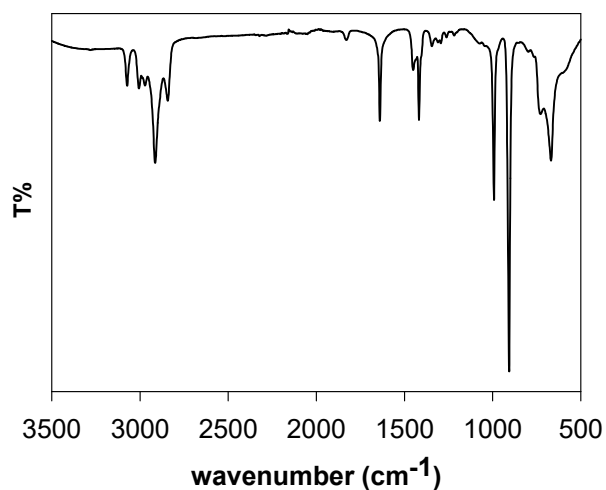

**Figure S6.** FTIR spectrum of entry **3** (ref. Table 1 of the manuscript).

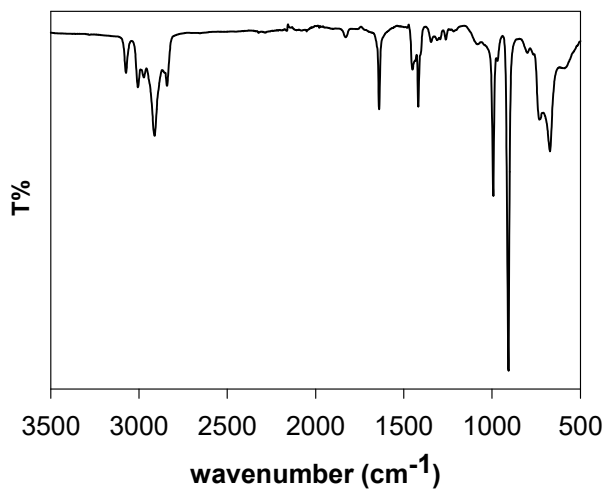

**Figure S7.** FTIR spectrum of entry 4 (ref. Table 1 of the manuscript).

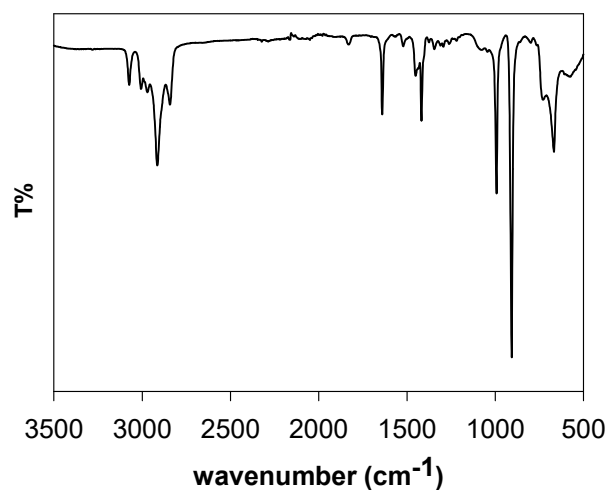

**Figure S8.** FTIR spectrum of entry 5 (ref. Table 1 of the manuscript).

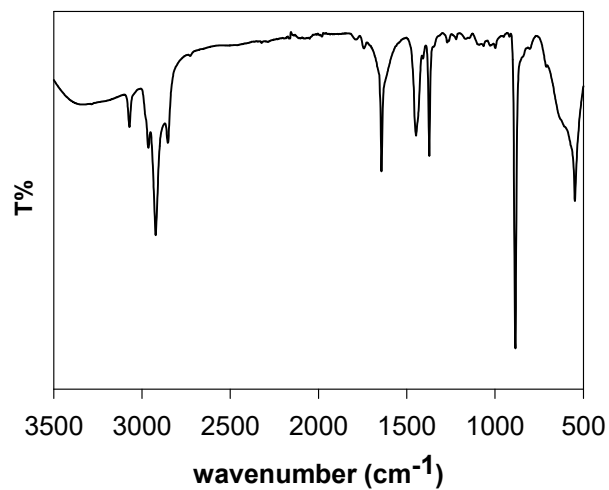

**Figure S9.** FTIR spectrum of entry 6 (ref. Table 1 of the manuscript).

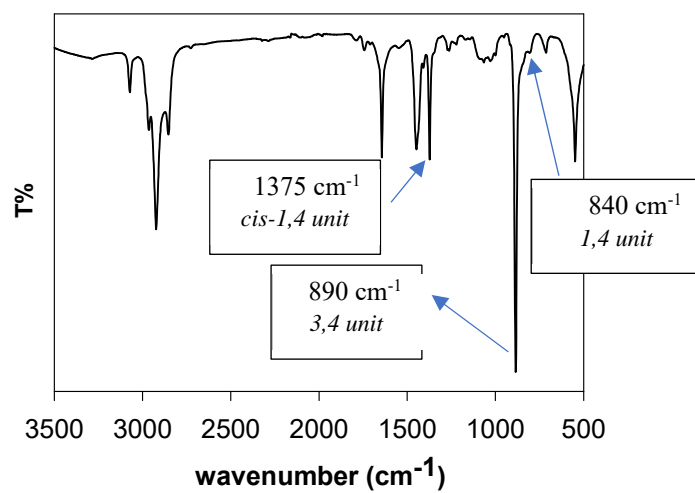

**Figure S10.** FTIR spectrum of entry 7 (ref. Table 1 of the manuscript).

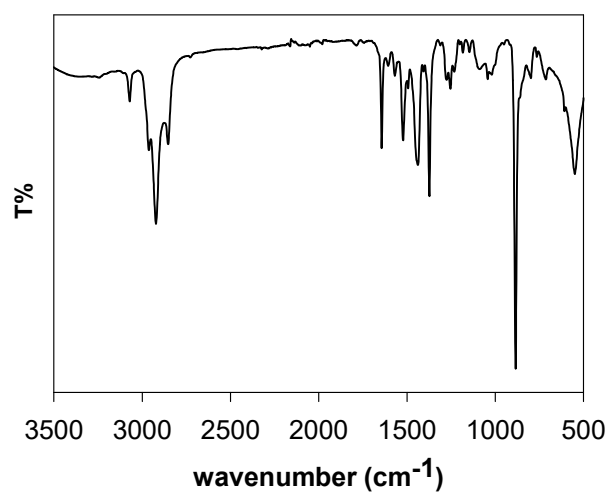

**Figure S11.** FTIR spectrum of entry 8 (ref. Table 1 of the manuscript).

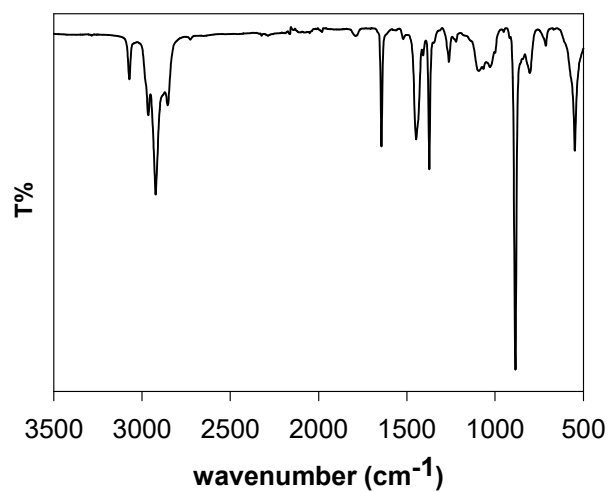

**Figure S12.** FTIR spectrum of entry 9 (ref. Table 1 of the manuscript).

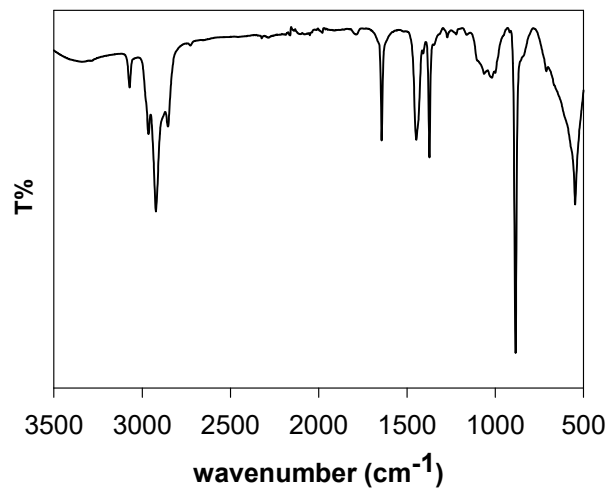

**Figure S13.** FTIR spectrum of entry **10** (ref Table 1 of the manuscript).

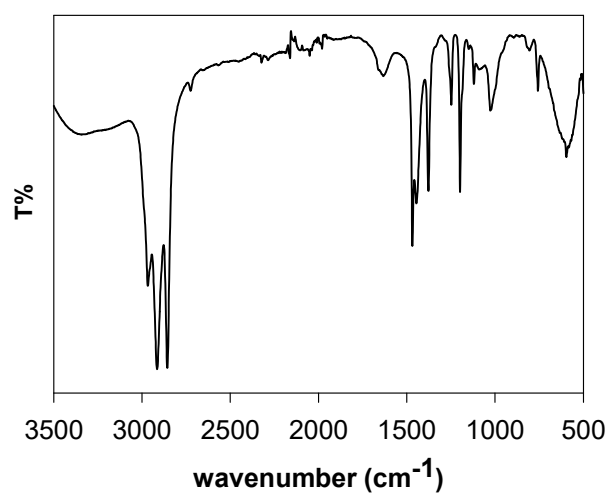

**Figure S14.** <sup>1</sup>H (bottom) and <sup>13</sup>C NMR (top) spectra of entry **1** (ref. Table 1 of the manuscript).

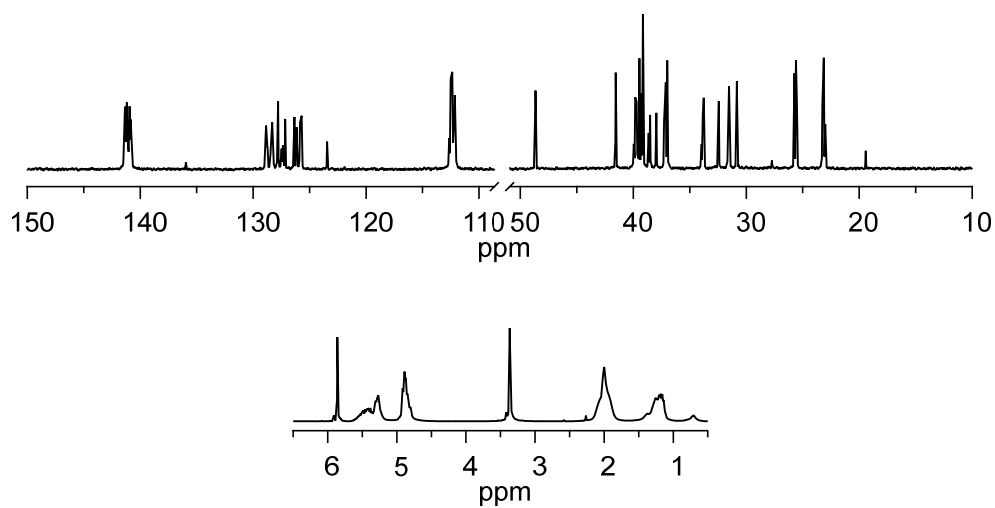

**Figure S15.**  $^1\text{H}$  (bottom) and  $^{13}\text{C}$  NMR (top) spectra of entry **2** (ref. Table 1 of the manuscript).

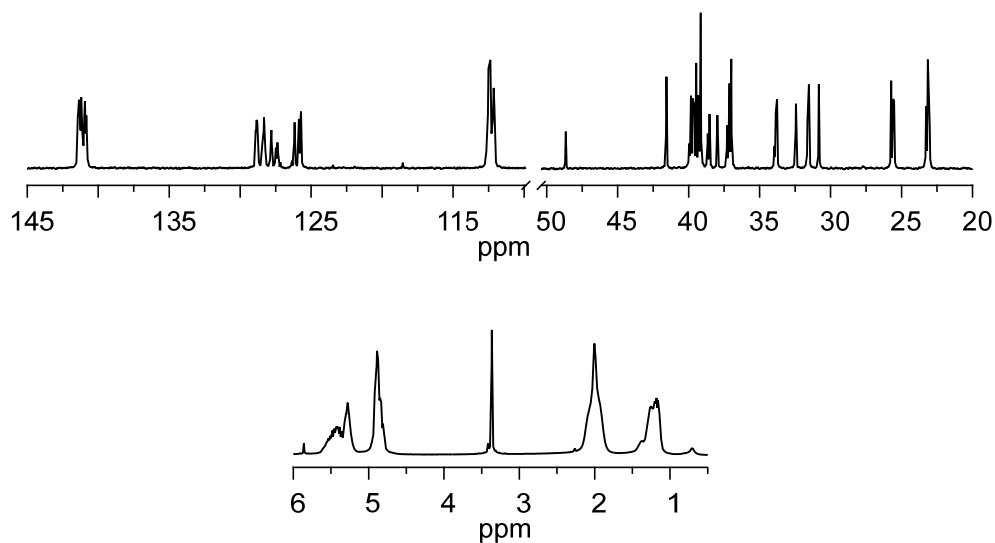

**Figure S16.**  $^1\text{H}$  (bottom) and  $^{13}\text{C}$  NMR (top) spectra of entry **3** (ref. Table 1 of the manuscript).

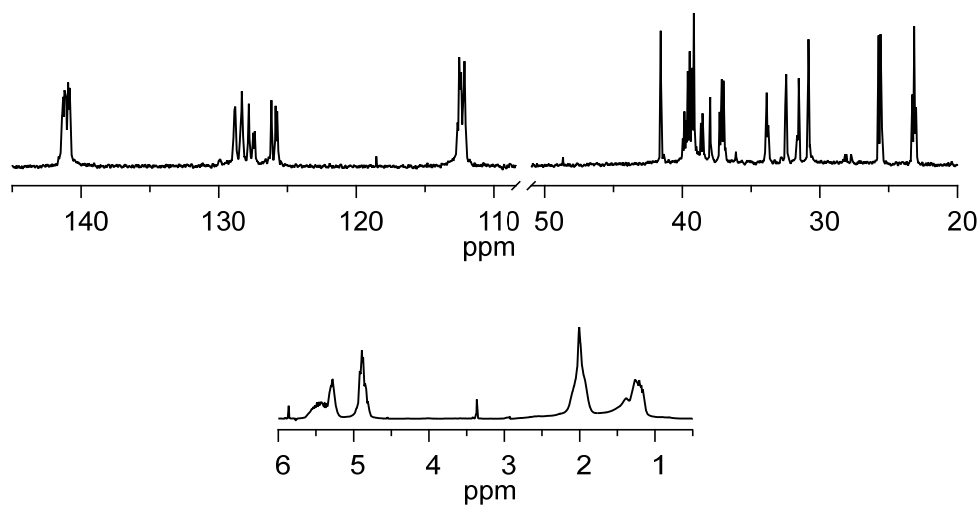



**Figure S17.**  $^1\text{H}$  (bottom) and  $^{13}\text{C}$  NMR (top) spectra of entry **4** (ref. Table 1 of the manuscript).

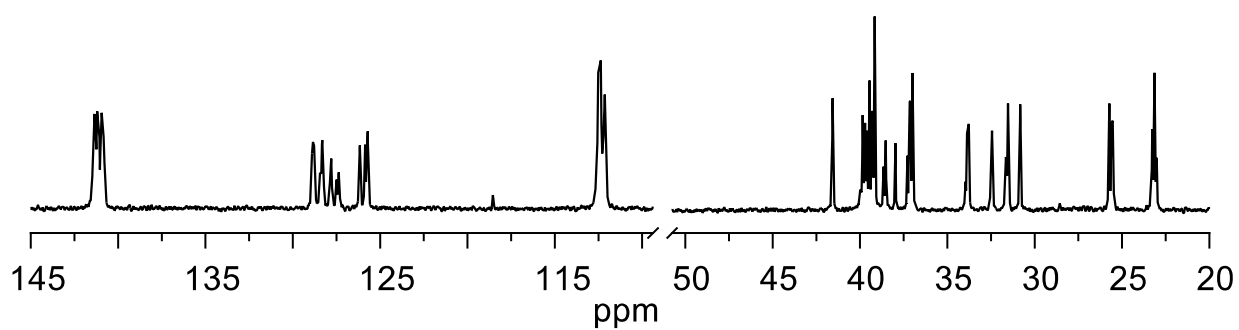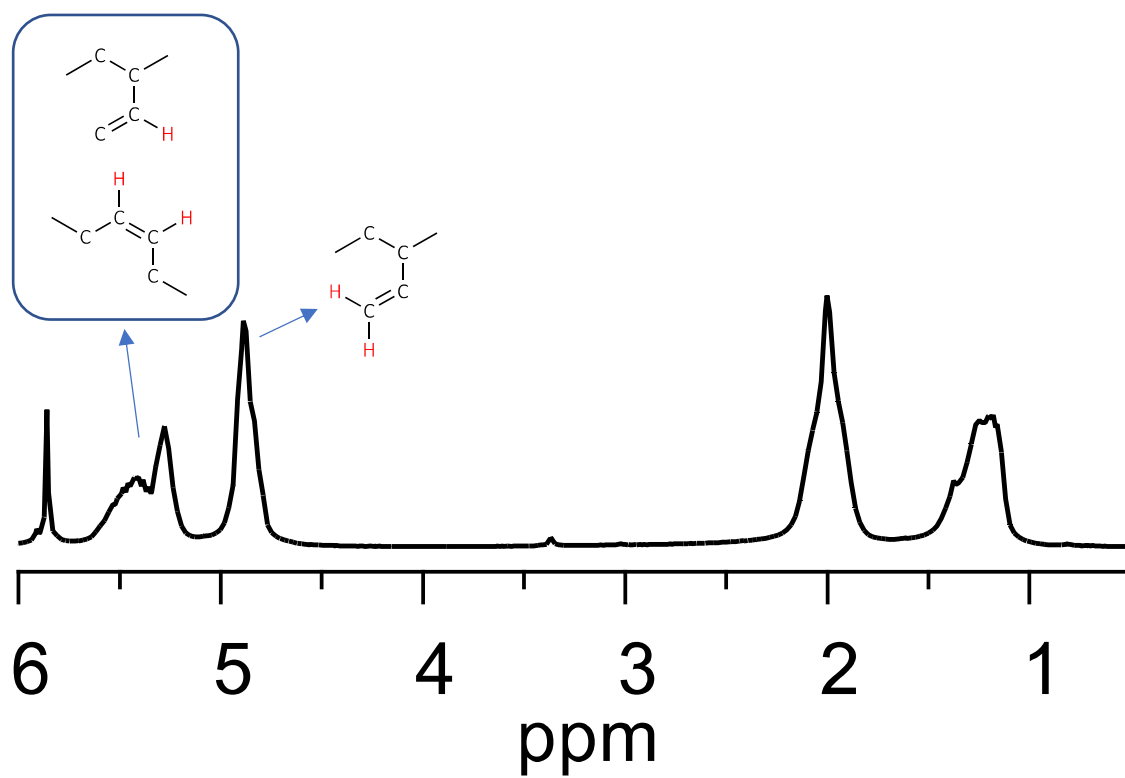

**Figure S18.**  $^1\text{H}$  (bottom) and  $^{13}\text{C}$  NMR (top) spectra of entry **5** (ref. Table 1 of the manuscript).

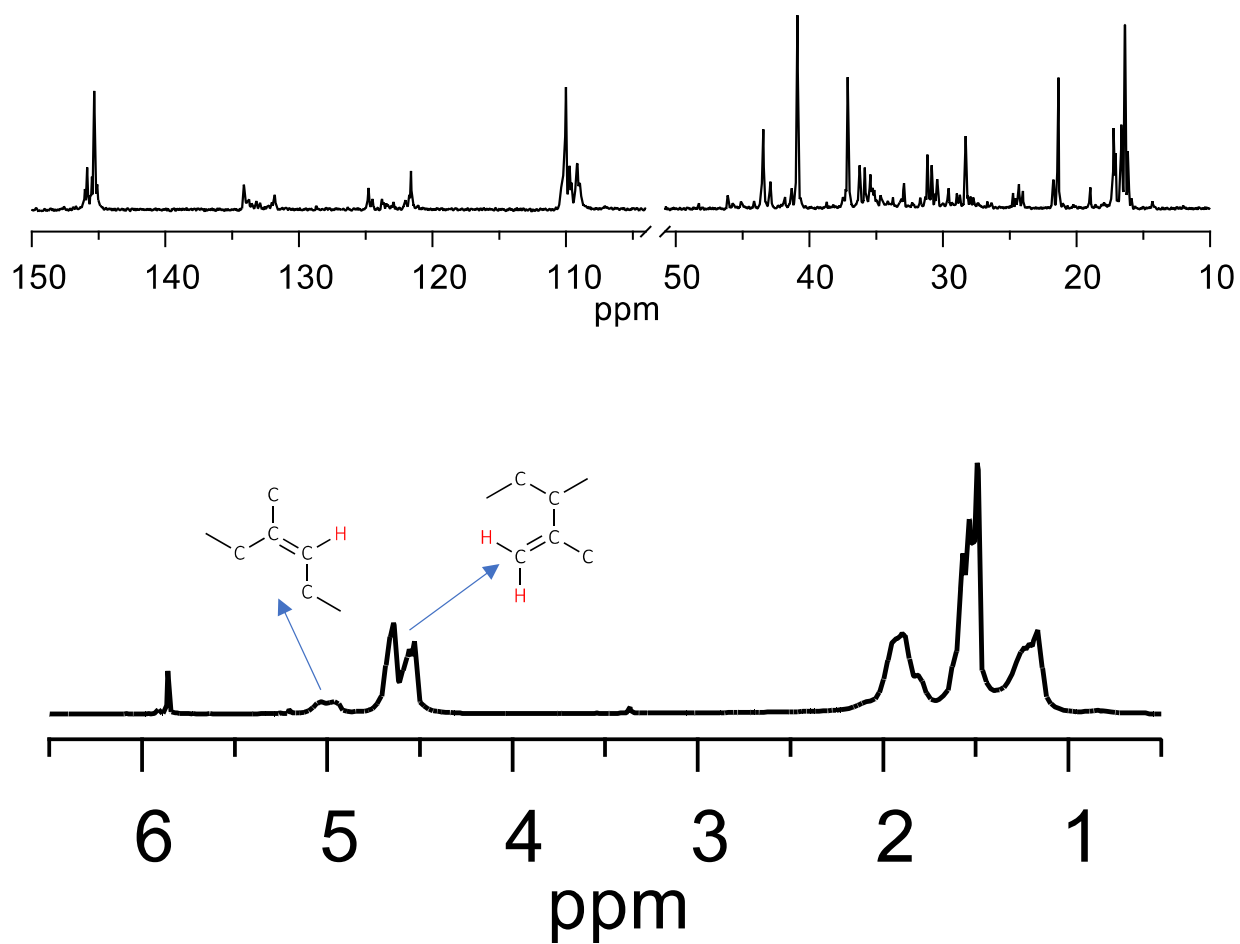

**Figure S19.**  $^1\text{H}$  (bottom) and  $^{13}\text{C}$  NMR (top) spectra of entry 6 (ref. Table 1 of the manuscript).

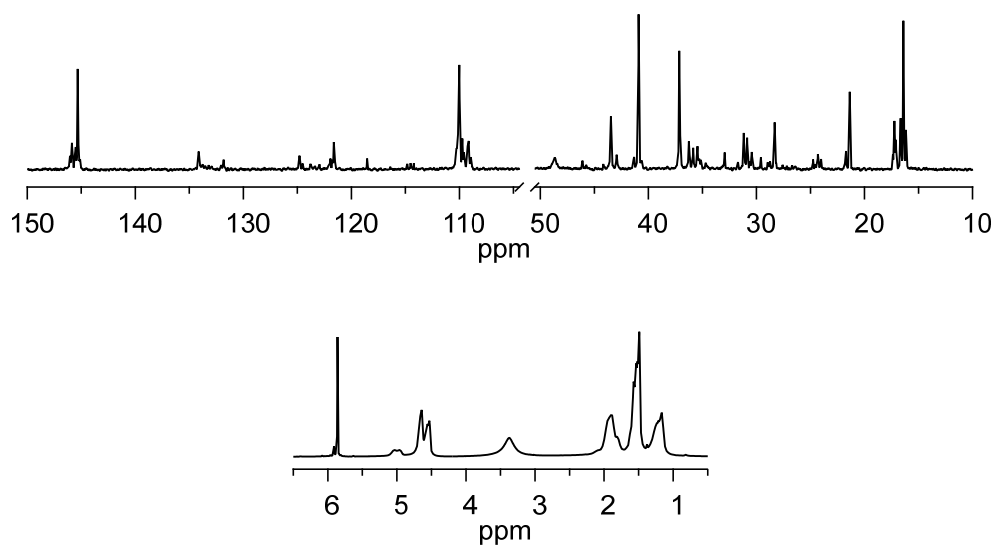

**Figure S20.**  $^1\text{H}$  (bottom) and  $^{13}\text{C}$  NMR (top) spectra of entry 7 (ref. Table 1 of the manuscript).

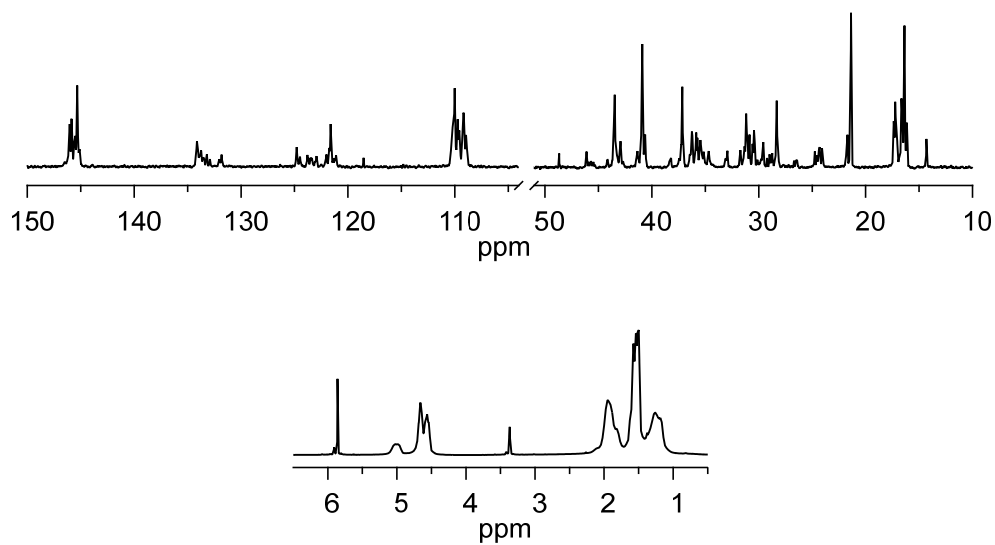

**Figure S21.**  $^1\text{H}$  (bottom) and  $^{13}\text{C}$  NMR (top) spectra of entry **8** (ref. Table 1 of the manuscript).

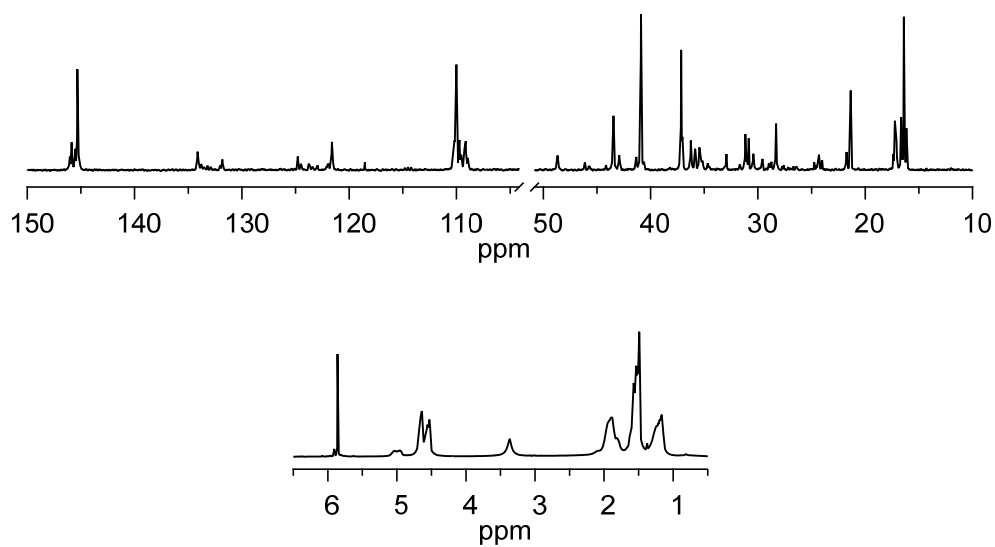

**Figure S22.**  $^1\text{H}$  (bottom) and  $^{13}\text{C}$  NMR (top) spectra of entry **9** (ref. Table 1 of the manuscript).

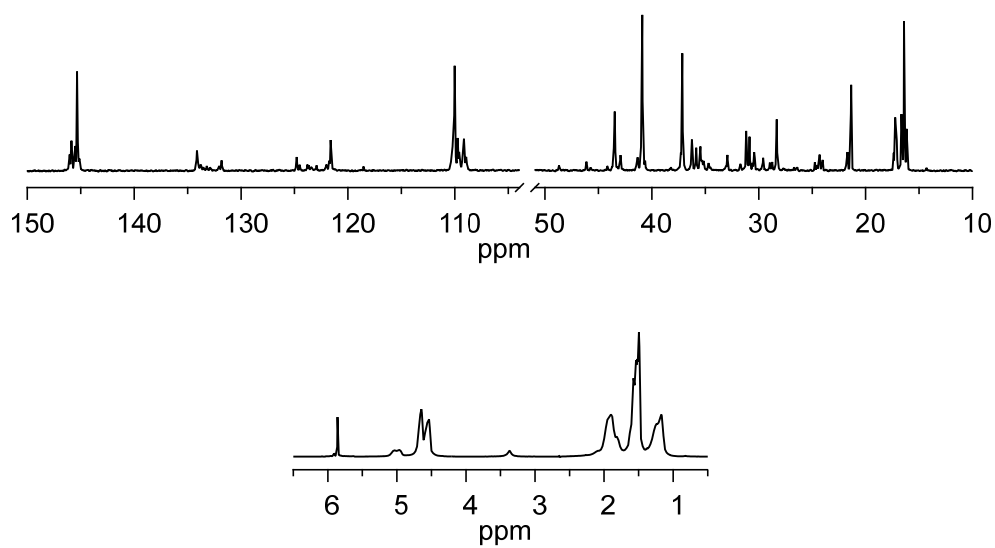

Supplement: s1 [file s1]
